# Supplementary material for: Regulation of 8-Hydroxydaidzein in IRF3-Mediated Gene Expression in LPS-Stimulated Murine Macrophages
Source: PubMed Central journal article supplement (PMC7072285; doi:10.3390/biom10020238), 2020-02-04
Supplement: biomolecules-10-00238-s001.pdf [file biomolecules-10-00238-s001.pdf]

## Supplementary Figures

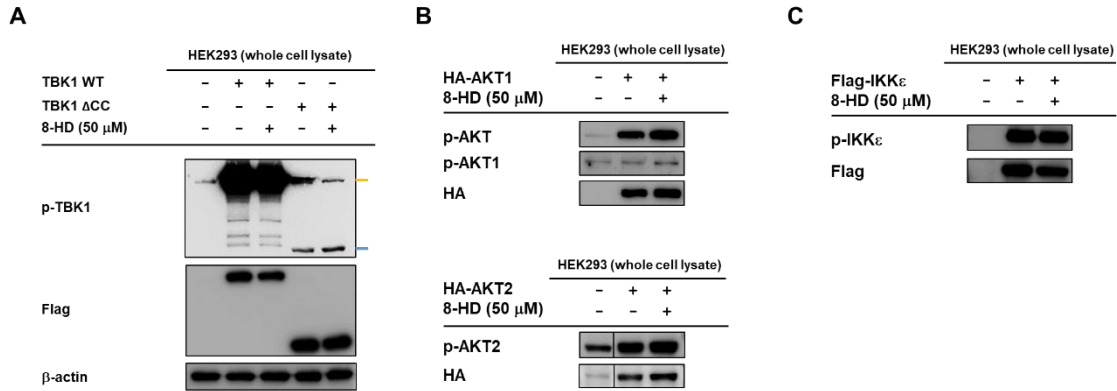

**Figure S1. 8-HD does not affect autophosphorylation of TBK1 and AKT.** HEK293T cells ( $10^6$  cells/ml) were transfected using TBK1 WT, TBK1  $\Delta$ CC, HA-AKT1, HA-AKT2, or Flag-IKK $\epsilon$  (0.8  $\mu$ g/ml) as indicated for 24 h, followed by treatment with 8-HD (50  $\mu$ M) or vehicle as indicated for additional 24 h without changing the media. (A) The effect of 8-HD on autophosphorylation of TBK1 was analyzed. The phosphorylation level of TBK1 and the level of Flag in whole cell lysates were analyzed by immunoblotting. (B) The effect of 8-HD on autophosphorylation of AKT was determined. The phosphorylation of AKT1, AKT2, and HA in whole cell lysates was analyzed by immunoblotting. (C) The effect of 8-HD on autophosphorylation of IKK $\epsilon$  was determined. The phosphorylation of IKK $\epsilon$  and Flag in whole cell lysates was analyzed by immunoblotting.

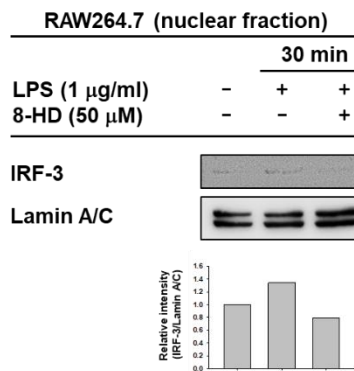

**Figure S2. 8-HD inhibits nuclear translocation of IRF3.** RAW264.7 cells ( $5 \times 10^6$  cells/ml) were pre-treated with 8-HD (50  $\mu$ M) for 30 min, followed by incubation with LPS (1  $\mu$ g/ml) for 30 min. The level of translocated IRF-3 was determined by immunoblotting of the nuclear fraction. Lamin A/C was used as a loading control for the nuclear fraction.

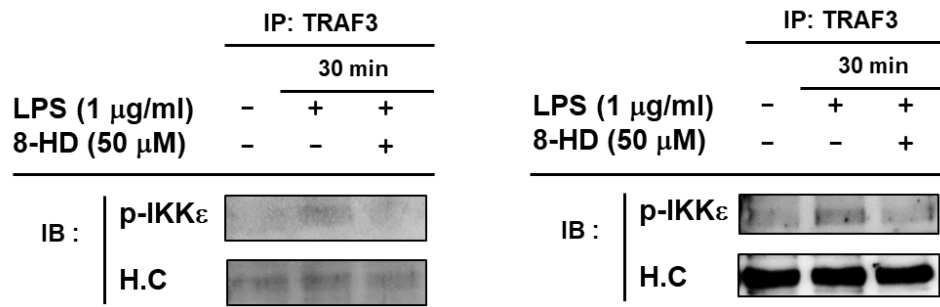

**Figure S3. Replicates results of immunoprecipitation experiments.** Endogenous TRAF3 was immunoprecipitated from LPS-induced RAW264.7 cells pre-treated with or without 8-HD (50  $\mu$ M). The level of phosphorylated IKK $\epsilon$  were determined by immunoblotting. H.C: Heavy chain.
